# Supplementary material for: Identification of two mutations increasing the methanol tolerance of Corynebacterium glutamicum
Source: PubMed Central journal article supplement (PMC4609165; doi:10.1186/s12866-015-0558-6), 2015-10-16
Supplement: 12866_2015_558_MOESM1_ESM.pdf [file 12866_2015_558_MOESM1_ESM.pdf]

# Identification of two mutations increasing the methanol tolerance of *Corynebacterium glutamicum*

## Supplementary Information

**Lennart Leßmeier & Volker F. Wendisch**

Genetics of Prokaryotes, Faculty of Biology & Center for Biotechnology,  
Bielefeld University, Bielefeld 33615, Germany

Corresponding author:

Prof. Dr. Volker F. Wendisch, Genetics of Prokaryotes, Faculty of Biology & Center for  
Biotechnology, Bielefeld University, Universitätsstr. 25, 33615 Bielefeld, Germany  
volker.wendisch@uni-bielefeld.de

### Content:

**Table S1** Genome-wide comparison of mRNA levels between the strains Tol1 and *C. glutamicum* WT(pVWEx1) during growth in LB complex medium

**Table S2** Genome-wide comparison of mRNA levels in Tol1 and *C. glutamicum* wild type cultivated in minimal medium with 100 mM glucose in presence or absence of methanol

**Table S3.** Mutations detected in strain Tol1 and a control strain in comparison to the *C. glutamicum* wild type genome sequence NC\_006958.1

**Table S4** Oligonucleotides used in this study

**Figure S1** Growth in the presence of formaldehyde (A) and formaldehyde degradation (B)

**Figure S2** Growth of *C. glutamicum* wild type with propionate and methanol

**Figure S3.** Growth of *C. glutamicum*  $\Delta ramA$  with methanol

**Figure S4.** Growth of *C. glutamicum*  $\Delta cat$  with methanol.

**Figure S5.** Biomass formation of *C. glutamicum* wild type, Tol1, T2840 and  $\Delta cat$  in minimal medium with ethanol as sole carbon source.

### **Supplementary tables**

**Table S1.** Genome-wide comparison of mRNA levels between the strains Tol1 and *C. glutamicum* WT(pVWEx1) during growth in LB complex medium.

| Gene ID | Gene name    | Annotation                       | p adjusted <sup>a)</sup> | M-value Tol1/WT <sup>b)</sup> |
|---------|--------------|----------------------------------|--------------------------|-------------------------------|
| cg0760  | <i>prpB2</i> | Methylisocitrate lyase           | 0.000                    | 1.7                           |
| cg0759  | <i>prpD2</i> | 2-Methylcitrate dehydratase      | 0.000                    | 1.5                           |
| cg2833  | <i>cysK</i>  | O-Acetylserine (Thiol)-Lyase     | 0.000                    | 1.4                           |
| cg0762  | <i>prpC2</i> | 2-Methylcitrate synthase         | 0.031                    | 1.2                           |
| cg0755  | <i>metY</i>  | O-Acetylhomoserine sulfhydrylase | 0.002                    | 1.1                           |

<sup>a)</sup> p-value adjusted with the False Discovery Rate approach. Genes with a value < 0.05 are considered as significant.

<sup>b)</sup> Dual logarithm of the average ratio of medians. Only genes regulated more than two-fold were considered. Two biological replicates were performed.

**Table S2.** Genome-wide comparison of mRNA levels in Tol1 and *C. glutamicum* wild type cultivated in minimal medium with 100 mM glucose in presence or absence of methanol.

| Gene ID | Gene name    | Annotation                                                                                             | M-values (+ MeOH/ - MeOH) <sup>a)</sup> |      |
|---------|--------------|--------------------------------------------------------------------------------------------------------|-----------------------------------------|------|
|         |              |                                                                                                        | Tol1                                    | WT   |
| cg0180  | <i>maa</i>   | Maltose O-acetyltransferase                                                                            | 1.0                                     | n.d. |
| cg0607  | -            | Putative secreted protein                                                                              | n.d.                                    | 1.2  |
| cg0689  | -            | Hypothetical protein                                                                                   | 1.1                                     | n.d. |
| cg0697  | -            | Conserved hypothetical protein                                                                         | n.d.                                    | 1.0  |
| cg0762  | <i>prpC2</i> | 2-Methylcitrate synthase, involved in propionate catabolism                                            | 1.2                                     | -0.6 |
| cg0791  | <i>pyc</i>   | Pyruvate carboxylase                                                                                   | 0.3                                     | 1.2  |
| cg0792  | -            | Hypothetical protein                                                                                   | n.d.                                    | 1.2  |
| cg0952  | -            | Putative integral membrane protein                                                                     | -0.2                                    | 1.2  |
| cg0953  | -            | Putative Na <sup>+</sup> /solute symporter, solute:sodium symporter (SSS) family                       | 0.4                                     | 1.1  |
| cg1291  | -            | Putative membrane protein                                                                              | 2.0                                     | 1.0  |
| cg1327  | -            | Putative transcriptional regulator, Crp-family                                                         | 1.2                                     | n.d. |
| cg1328  | -            | Putative heavy-metal ion transporting P-type ATPase                                                    | 1.2                                     | n.d. |
| cg1392  | -            | Putative transcriptional regulator, HTH_3-family                                                       | 1.2                                     | n.d. |
| cg1484  | -            | Putative secreted protein                                                                              | 1.1                                     | n.d. |
| cg1625  | -            | Hypothetical protein                                                                                   | 1.7                                     | 1.6  |
| cg1895  | -            | Putative secreted protein                                                                              | 1.3                                     | n.d. |
| cg1917  | -            | Hypothetical protein                                                                                   | 1.0                                     | n.d. |
| cg2004  | -            | Conserved hypothetical protein                                                                         | 1.1                                     | n.d. |
| cg2047  | -            | Putative secreted protein                                                                              | n.d.                                    | 1.1  |
| cg2226  | -            | Conserved hypothetical protein, Rossmann-fold nucleotide-binding protein involved in DNA uptake        | 1.2                                     | n.d. |
| cg2500  | -            | Putative transcriptional regulator, ArsR-family                                                        | 1.1                                     | n.d. |
| cg2559  | <i>aceB</i>  | Malate synthase                                                                                        | 0.7                                     | 2.9  |
| cg2560  | <i>aceA</i>  | Isocitrate lyase                                                                                       | 0.7                                     | 4.3  |
| cg2846  | <i>pstS</i>  | ABC-type putative phosphate transporter, substrate-binding lipoprotein (TC 3.A.1.7.1)                  | 2.8                                     | n.d. |
| cg2962  | -            | Hypothetical protein, uncharacterized enzyme involved in biosynthesis of extracellular polysaccharides | 2.2                                     | n.d. |
| cg3047  | <i>ackA</i>  | Acetate kinase                                                                                         | 0.6                                     | 2.6  |
| cg3048  | <i>pta</i>   | Phosphate acetyltransferase                                                                            | n.d.                                    | 2.1  |
| cg3107  | <i>adhA</i>  | Alcohol dehydrogenase                                                                                  | 1.5                                     | 1.7  |
| cg3117  | <i>cysX</i>  | Ferredoxin-like protein, involved in electron-transfer                                                 | 0.3                                     | 1.1  |
| cg3192  | -            | Putative secreted or membrane protein                                                                  | 1.3                                     | n.d. |
| cg3219  | <i>ldh</i>   | L-Lactate dehydrogenase                                                                                | 2.4                                     | n.d. |
| cg3255  | <i>uspA3</i> | Universal stress protein E                                                                             | 1.3                                     | n.d. |
| cg3272  | -            | Putative membrane protein                                                                              | 1.6                                     | n.d. |

**Table S2** (continued)

| Gene ID | Gene name    | Annotation                                                                                                               | M-values (+ MeOH/ - MeOH) <sup>a)</sup> |      |
|---------|--------------|--------------------------------------------------------------------------------------------------------------------------|-----------------------------------------|------|
|         |              |                                                                                                                          | Tol1                                    | WT   |
| cg3288  | -            | Hypothetical protein                                                                                                     | n.d.                                    | 1.0  |
| cg3303  | -            | Putative transcriptional regulator, PadR-family                                                                          | 2.5                                     | n.d. |
| cg3327  | <i>dps</i>   | Putative starvation-induced DNA protecting protein                                                                       | 1.3                                     | n.d. |
| cg3347  | -            | Putative secreted or membrane protein                                                                                    | 1.0                                     | n.d. |
| cg3402  | -            | Putative Hg <sup>2+</sup> permease, MerTP-family                                                                         | 1.9                                     | n.d. |
| ISCg2   | -            | ISCg2 (cg2854 cg2426 cg0226 cg3151 cg2354)                                                                               | 1.2                                     | n.d. |
| cg0133  | -            | Putative secondary aminobenzoyl-glutamate transporter, AbgT-family                                                       | n.d.                                    | -1.2 |
| cg0134  | -            | Hydrolase, Ama/HipO/HyuC-family                                                                                          | n.d.                                    | -1.1 |
| cg0277  | -            | Putative secondary Na <sup>+</sup> :di-/tricarboxylate symporter, divalent anion:Na <sup>+</sup> symporter (DASS) family | n.d.                                    | -1.2 |
| cg0466  | -            | Conserved putative secreted protein                                                                                      | n.d.                                    | -1.1 |
| cg0719  | <i>crtYe</i> | C50 carotenoid epsilon cyclase                                                                                           | n.d.                                    | -1.0 |
| cg0771  | <i>irp1</i>  | ABC-type putative iron-siderophore transporter, substrate-binding lipoprotein                                            | n.d.                                    | -1.1 |
| cg0890  | -            | Conserved hypothetical protein                                                                                           | n.d.                                    | -1.0 |
| cg1846  | -            | Putative transcriptional regulator, TetR-family                                                                          | -1.0                                    | -0.8 |
| cg1847  | -            | Conserved hypothetical protein                                                                                           | -1.1                                    | n.d. |
| cg1877  | -            | Lauroyl/myristoyl acyltransferase, lipid A biosynthesis                                                                  | -1.3                                    | n.d. |
| cg2235  | <i>rplS</i>  | 50S ribosomal protein L19                                                                                                | n.d.                                    | -1.2 |
| cg2836  | <i>sucD</i>  | Succinate--CoA ligase (ADP-forming), alpha subunit                                                                       | n.d.                                    | -2.7 |
| cg2837  | <i>sucC</i>  | Succinate--CoA ligase (ADP-forming), beta subunit                                                                        | n.d.                                    | -2.0 |
| cg2911  | -            | ABC-type putative Mn/Zn transporter, substrate-binding lipoprotein                                                       | -2.8                                    | n.d. |
| cg2912  | -            | ABC-type putative Mn/Zn transporter, ATPase subunit                                                                      | -2.4                                    | n.d. |
| cg2913  | -            | ABC-type putative Mn/Zn transporter, permease subunit                                                                    | -1.9                                    | n.d. |
| cg2949  | -            | Putative secreted protein                                                                                                | n.d.                                    | -1.5 |
| cg3035  | -            | Putative GCN5-related N-acetyltransferase                                                                                | -1.4                                    | n.d. |
| cg3214  | -            | Conserved hypothetical protein                                                                                           | n.d.                                    | -1.1 |
| cg3335  | <i>mez</i>   | Malate dehydrogenase (oxaloacetate-decarboxylating) (NADP(+))                                                            | n.d.                                    | -1.7 |
| cg3395  | <i>proP</i>  | Putative proline/betaine permease, MFS-type                                                                              | n.d.                                    | -1.8 |
| cg3404  | -            | ABC-type putative iron(III) dicitrate transporter, substrate-binding lipoprotein                                         | n.d.                                    | -1.7 |
| cg3430  | -            | Conserved hypothetical protein                                                                                           | -1.0                                    | n.d. |
| cg3431  | <i>rnpA</i>  | Ribonuclease P                                                                                                           | -2.0                                    | -0.6 |

<sup>a)</sup> Dual logarithm of the average ratio of medians. Only genes regulated more than two-fold in at least one strain were considered.

n.d.) No significant result. Only results with a p-value (adjusted with the False Discovery Rate approach) of  $\leq 0.05$  were considered to be significant.

Two respectively three biological replicates were performed.

**Table S3.** Mutations detected in strain Toll and a control strain in comparison to the *C. glutamicum* wild type genome sequence NC\_006958.1.

| Nucleotide in WT |   | WT $\Delta hpr$ control <sup>a)</sup> |          |                   | Toll     |          |                   | Gene       |
|------------------|---|---------------------------------------|----------|-------------------|----------|----------|-------------------|------------|
|                  |   | mutation                              |          | amino acid change | mutation |          | amino acid change |            |
| 48014            | G | SNP                                   | T        | T3K               | SNP      | T        | T3K               | cg0062     |
| 66717            | T | Del                                   | $\Delta$ | -                 | Del      | $\Delta$ | -                 | cg0085     |
| 170052           | C |                                       |          |                   | SNP      | T        | A19V              | cg0198     |
| 268952           | G | Ins                                   | G        | -                 | Ins      | G        | -                 | cg0304     |
| 273896           | A | SNP                                   | G        | -                 | SNP      | G        | -                 | cg0309     |
| 278749           | A | SNP                                   | T        | -                 | SNP      | T        | -                 | intergenic |
| 322774           | C | Del                                   | $\Delta$ | -                 | Del      | $\Delta$ | -                 | intergenic |
| 364913           | A | SNP                                   | C        | E363D             | SNP      | C        | E363D             | cg0414     |
| 390756           | G | Ins                                   | G        | -                 | Ins      | G        | -                 | intergenic |
| 400383           | G | Ins                                   | G        | -                 | Ins      | G        | -                 | intergenic |
| 409175           | G | SNP                                   | T        | A267D             | SNP      | T        | A267D             | cg0464     |
| 554148           | G | Del                                   | $\Delta$ | -                 | Del      | $\Delta$ | -                 | intergenic |
| 554257           | G | Del                                   | $\Delta$ | -                 | Del      | $\Delta$ | -                 | intergenic |
| 554305           | G | Del                                   | $\Delta$ | -                 | Del      | $\Delta$ | -                 | intergenic |
| 578120           | G | Ins                                   | G        | -                 | Ins      | G        | -                 | intergenic |
| 668739           | C |                                       |          |                   | SNP      | T        | A165T             | cg0755     |
| 844090           | A | SNP                                   | G        | -                 | SNP      | G        | -                 | cg0911     |
| 844495           | C | SNP                                   | G        | G50R              | SNP      | G        | G50R              | cg0911     |
| 851860           | G | Ins                                   | G        | -                 | Ins      | G        | -                 | intergenic |
| 892384           | C | SNP                                   | G        | P1748A            | SNP      | G        | P1748A            | cg0957     |
| 960473           | G | Del                                   | $\Delta$ | -                 | Del      | $\Delta$ | -                 | intergenic |
| 978319           | A | SNP                                   | C        | K188N             | SNP      | C        | K188N             | cg1052     |
| 1035302          | C |                                       |          |                   | SNP      | G        | -                 | intergenic |
| 1060070          | A | Ins                                   | A        | -                 | Ins      | A        | -                 | intergenic |
| 1111144          | G | Ins                                   | G        | -                 | Ins      | G        | -                 | cg1206     |
| 1126684          | A | SNP                                   | G        | C269R             | SNP      | G        | C269R             | cg1226     |
| 1143723          | T |                                       |          |                   | SNP      | C        | L328S             | cg1245     |
| 1232173          | A | SNP                                   | C        | -                 | SNP      | C        | -                 | cg1325     |
| 1344201          | C | Ins                                   | A        | -                 | Ins      | A        | -                 | intergenic |
| 1344201          | C | Ins                                   | A        | -                 | Ins      | A        | -                 | intergenic |
| 1714259          | A | SNP                                   | C        | K186Q             | SNP      | C        | K186Q             | cg1819     |
| 1753385          | C | SNP                                   | G        | D140E             | SNP      | G        | D140E             | cg1859     |
| 1753388          | G | SNP                                   | T        | -                 | SNP      | T        | -                 | cg1859     |
| 1753595          | G | Del                                   | $\Delta$ | -                 | Del      | $\Delta$ | -                 | intergenic |
| 1763157          | C | SNP                                   | T        | V275I             | SNP      | T        | V275I             | cg1869     |
| 1765670          | A | SNP                                   | T        | V182E             | SNP      | T        | V182E             | cg1872     |
| 1765671          | C | SNP                                   | G        | V182L             | SNP      | G        | V182L             | cg1872     |
| 1811091          | C | SNP                                   | T        | -                 | SNP      | T        | -                 | intergenic |
| 1963729          | A |                                       |          |                   | SNP      | G        | -                 | cg2069     |
| 1963843          | C |                                       |          |                   | SNP      | T        | -                 | cg2069     |
| 1963845          | T |                                       |          |                   | SNP      | G        | -                 | cg2069     |
| 1963857          | G |                                       |          |                   | SNP      | A        | -                 | cg2069     |
| 1963885          | A |                                       |          |                   | SNP      | G        | -                 | cg2069     |
| 1963900          | A |                                       |          |                   | SNP      | T        | -                 | cg2069     |
| 1963903          | C |                                       |          |                   | SNP      | A        | -                 | cg2069     |
| 1963908          | C |                                       |          |                   | SNP      | A        | V191F             | cg2069     |
| 1964274          | A |                                       |          |                   | SNP      | T        | S69T              | cg2069     |

**Table S3** (continued)

| Nucleotide in WT |   | WT $\Delta hpr$ control <sup>a)</sup> |          |                   | Toll     |          |                   | Gene       |
|------------------|---|---------------------------------------|----------|-------------------|----------|----------|-------------------|------------|
|                  |   | mutation                              |          | amino acid change | mutation |          | amino acid change |            |
| 1964279          | A |                                       |          |                   | SNP      | T        | F67Y              | cg2069     |
| 1964298          | T |                                       |          |                   | SNP      | C        | K61E              | cg2069     |
| 1964302          | A |                                       |          |                   | SNP      | T        | -                 | cg2069     |
| 1964305          | C |                                       |          |                   | SNP      | T        | -                 | cg2069     |
| 1964329          | G |                                       |          |                   | SNP      | A        | -                 | cg2069     |
| 1964338          | A |                                       |          |                   | SNP      | G        | -                 | cg2069     |
| 1964352          | G |                                       |          |                   | SNP      | A        | Q43*              | cg2069     |
| 1964370          | T |                                       |          |                   | SNP      | C        | K37E              | cg2069     |
| 1964395          | T |                                       |          |                   | SNP      | C        | -                 | cg2069     |
| 1964407          | T |                                       |          |                   | SNP      | C        | -                 | cg2069     |
| 1995296          | G | SNP                                   | A        | -                 | SNP      | A        | -                 | intergenic |
| 2002299          | G | SNP                                   | T        | -                 | SNP      | T        | -                 | cg2111     |
| 2005932          | C | Del                                   | $\Delta$ | -                 | Del      | $\Delta$ | -                 | intergenic |
| 2012000          | G | SNP                                   | T        | G75V              | SNP      | T        | G75V              | cg2118     |
| 2028992          | A | SNP                                   | G        | S164P             | SNP      | G        | S164P             | cg2135     |
| 2030556          | C | SNP                                   | T        | -                 | SNP      | T        | -                 | intergenic |
| 2030620          | C |                                       |          |                   | SNP      | A        | -                 | intergenic |
| 2055662          | C | SNP                                   | G        | V31L              | SNP      | G        | V31L              | cg2167     |
| 2066532          | C | SNP                                   | G        | R81P              | SNP      | G        | R81P              | cg2176     |
| 2096312          | G |                                       |          |                   | SNP      | C        | D67H              | cg2204     |
| 2145398          | G | SNP                                   | T        | P47T              | SNP      | T        | P47T              | cg2262     |
| 2166305          | C | Ins                                   | C        | -                 | Ins      | C        | -                 | intergenic |
| 2245932          | T | SNP                                   | C        | -                 | SNP      | C        | -                 | intergenic |
| 2245934          | C | SNP                                   | A        | -                 | SNP      | A        | -                 | intergenic |
| 2253306          | A | SNP                                   | G        | -                 | SNP      | G        | -                 | cg2368     |
| 2327190          | T | Del                                   | $\Delta$ | -                 | Del      | $\Delta$ | -                 | intergenic |
| 2335863          | G | Del                                   | $\Delta$ | -                 | Del      | $\Delta$ | -                 | intergenic |
| 2339425          | T | Ins                                   | T        | -                 | Ins      | T        | -                 | intergenic |
| 2347748          | A | SNP                                   | G        | -                 | SNP      | G        | -                 | cg2460     |
| 2354473          | C |                                       |          |                   | SNP      | G        | -                 | intergenic |
| 2354476          | C | SNP                                   | T        | -                 | SNP      | T        | -                 | intergenic |
| 2354634          | C | SNP                                   | G        | V219L             | SNP      | G        | V219L             | cg2467     |
| 2361038          | A | SNP                                   | C        | K176N             | SNP      | C        | K176N             | cg2475     |
| 2361920          | T | Del                                   | $\Delta$ | -                 | Del      | $\Delta$ | -                 | intergenic |
| 2361925          | T | Del                                   | $\Delta$ | -                 | Del      | $\Delta$ | -                 | intergenic |
| 2441888          | T | Del                                   | $\Delta$ | -                 | Del      | $\Delta$ | -                 | intergenic |
| 2575624          | A | SNP                                   | G        | F212S             | SNP      | G        | F212S             | cg2701     |
| 2584857          | C | Ins                                   | C        | -                 | Ins      | C        | -                 | cg2712     |
| 2701531          | G |                                       |          |                   | SNP      | A        | Q342*             | cg2840     |
| 2714349          | G | Ins                                   | C        | -                 | Ins      | C        | -                 | intergenic |
| 2816685          | C | Ins                                   | G        | -                 | Ins      | G        | -                 | intergenic |
| 2855585          | G | SNP                                   | A        | R427Q             | SNP      | A        | R427Q             | cg3003     |

**Table S3** (continued 2)

| Nucleotide in WT |   | WT $\Delta hpr$ control <sup>a)</sup> |          |                   | Tol1     |          |                   | Gene       |
|------------------|---|---------------------------------------|----------|-------------------|----------|----------|-------------------|------------|
|                  |   | mutation                              |          | amino acid change | mutation |          | amino acid change |            |
| 2877096          | A | SNP                                   | G        | S45P              | SNP      | G        | S45P              | cg3018     |
| 2913129          | C | Ins                                   | C        | -                 | Ins      | C        | -                 | intergenic |
| 2913144          | T | Ins                                   | T        | -                 | Ins      | T        | -                 | intergenic |
| 3028090          | A | SNP                                   | G        | N9S               | SNP      | G        | N9S               | cg3170     |
| 3046767          | C | SNP                                   | T        | V54I              | SNP      | T        | V54I              | cg3182     |
| 3051028          | C | SNP                                   | G        | V351L             | SNP      | G        | V351L             | cg3187     |
| 3061630          | T | Del                                   | $\Delta$ | -                 | Del      | $\Delta$ | -                 | intergenic |
| 3099764          | T |                                       |          |                   | SNP      | C        | -                 | cg3237     |
| 3163180          | C |                                       |          |                   | SNP      | T        | -                 | intergenic |
| 3185193          | A | Del                                   | $\Delta$ | -                 | Del      | $\Delta$ | -                 | intergenic |
| 3186651          | A | SNP                                   | C        | E244D             | SNP      | C        | E244D             | cg3339     |
| 3219803          | C | SNP                                   | G        | G137A             | SNP      | G        | G137A             | cg3370     |

<sup>a)</sup> The strain  $\Delta hpr$  was used as a control, which carries an in-frame deletion of the gene *hpr*. This control strain is derived from the same wild type at the same time period as strain Tol1 and was used to exclude variations between the genome of the WT used here and the sequence deposited in the genome database. The deleted nucleotides of the *hpr* deletion are not listed.

\* SNP led to a translational stop codon.

**Table S4.** Oligonucleotides used in this study.

| Name    | Sequence (5' → 3') <sup>a</sup>    | Purpose                 |
|---------|------------------------------------|-------------------------|
| T0198 A | GGACTACCGACCAATGTTCTG              | Base exchange in cg0198 |
| T0198 B | CATCGTGGGTTTCAGCCACACGCATCCGCCTTAG | Base exchange in cg0198 |
| T0198 C | CTAAGGCGGATGCGTGTGGCTGAACCCACGATG  | Base exchange in cg0198 |
| T0198 D | CATGAACGGCTCGAGCATG                | Base exchange in cg0198 |
| T0755 A | CCACCTTCTCGTGGTTGTTG               | Base exchange in cg0755 |
| T0755 B | CTTCGGCGAGACTTTCACCAACCCACAGGCAGAC | Base exchange in cg0755 |
| T0755 C | GTCTGCCTGTGGGTTGGTGAAAGTCTCGCCGAAG | Base exchange in cg0755 |
| T0755 D | CGACAATTCCAATGCTGACCAGTGG          | Base exchange in cg0755 |
| T1245 A | CACGCTGGTAGGTAATTTTCAGCTCAGTG      | Base exchange in cg1245 |
| T1245 B | GCCAATGTATCCCGAGACTGGGTACACATAG    | Base exchange in cg1245 |
| T1245 C | CTATGTGTACCCAGTCTCGGGATACATTGGC    | Base exchange in cg1245 |
| T1245 D | CAGTCATGGACATCGACGAACTAGC          | Base exchange in cg1245 |
| T2204 A | CGCATTCGCCTCTGACGTTG               | Base exchange in cg2204 |
| T2204 B | GTTGAGCAGGTCGATGTGGCCGAG           | Base exchange in cg2204 |
| T2204 C | CTCGGCCACATCGACCTGCTCAAC           | Base exchange in cg2204 |
| T2204 D | CCAGTTTAGTTTGGCTACAGGGTGTG         | Base exchange in cg2204 |
| T2840 A | CTCGAAATGTTGTCGAGGC                | Base exchange in cg2840 |
| T2840 B | GCCCACAGTAGATCTCTAACCACCCAG        | Base exchange in cg2840 |
| T2840 C | CTGGGTGGTTAGAGATCTACTGTGGGC        | Base exchange in cg2840 |
| T2840 D | GTATGCACGACATCTGGTCTG              | Base exchange in cg2840 |

<sup>a</sup> Bold bases are different to the wild-type



Supplementary figures

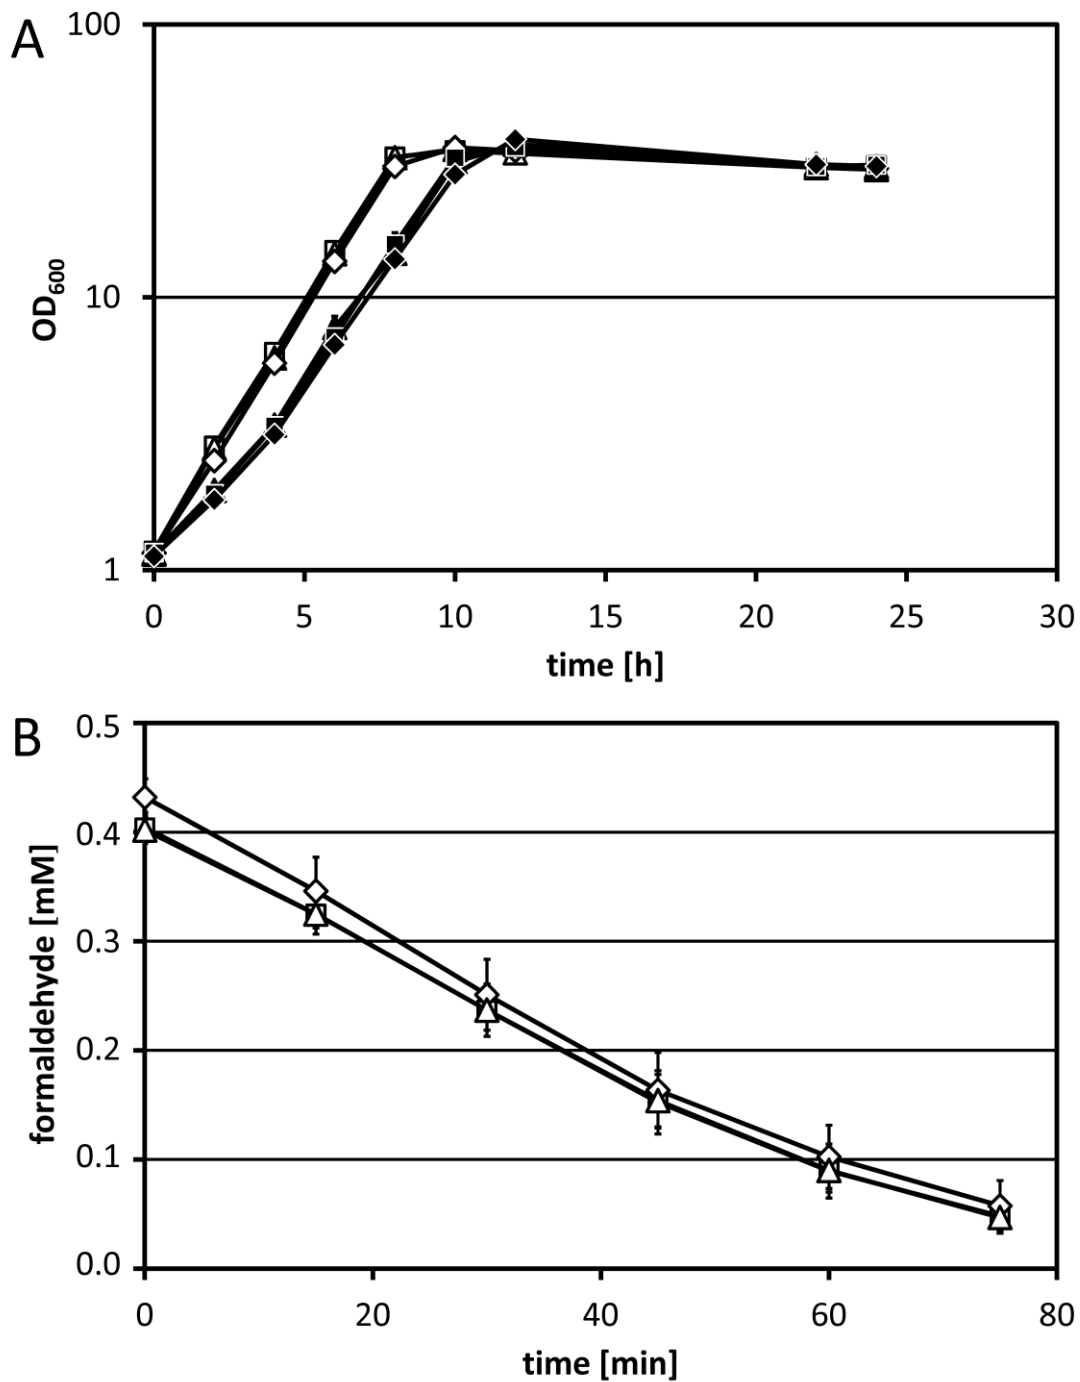

**Figure S1. Growth in the presence of formaldehyde (A) and formaldehyde degradation (B).** (A) Growth of *C. glutamicum* WT(pVWEx1) (diamonds) and strain Tol1 (triangles) in minimal medium with 100 mM glucose and without (open symbols) or with 1 mM (closed symbols) formaldehyde. (B) *In vivo* formaldehyde degradation assay of the strains mentioned above. Means and standard deviations of two independent cultures are shown.

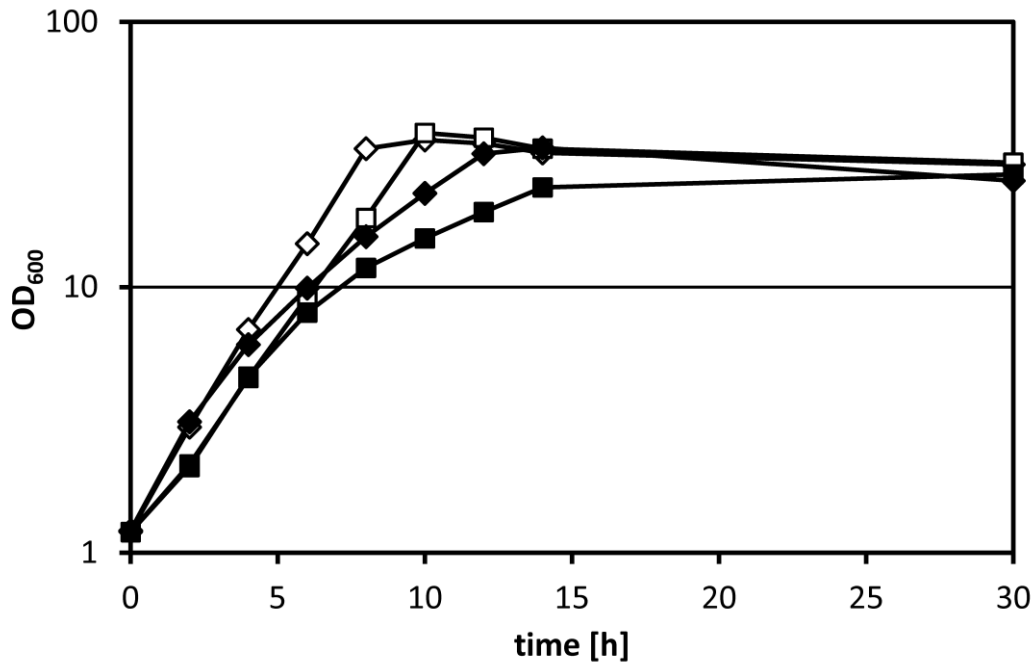

**Figure S2. Growth of *C. glutamicum* wild type with propionate and methanol.** *C. glutamicum* wild type was cultivated in minimal medium with 100 mM glucose (open symbols), supplemented with (squares) or without (diamonds) 0.5 g/l propionate. Addition of 120 mM methanol occurred after 2 h (closed symbols). Means and standard deviations of two independent cultures are shown.

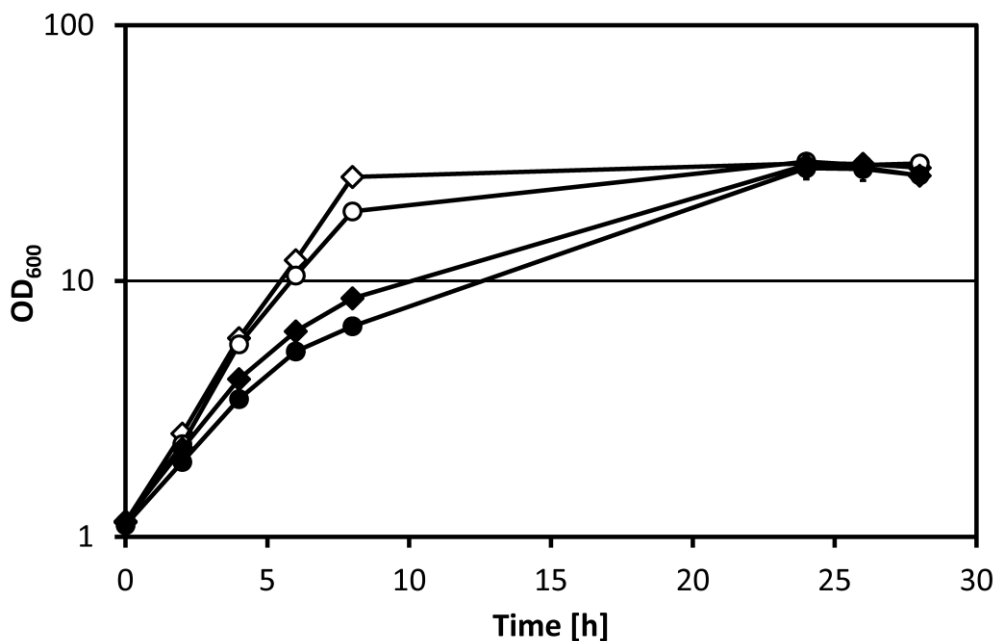

**Figure S3. Growth of *C. glutamicum*  $\Delta ramA$  with methanol.** *C. glutamicum* wild type (diamonds) and the deletion mutant  $\Delta ramA$  (circles) were cultivated in minimal medium with 100 mM glucose (open symbols) and additional 480 mM methanol (closed symbols). Means and standard deviations of two independent cultures are shown.

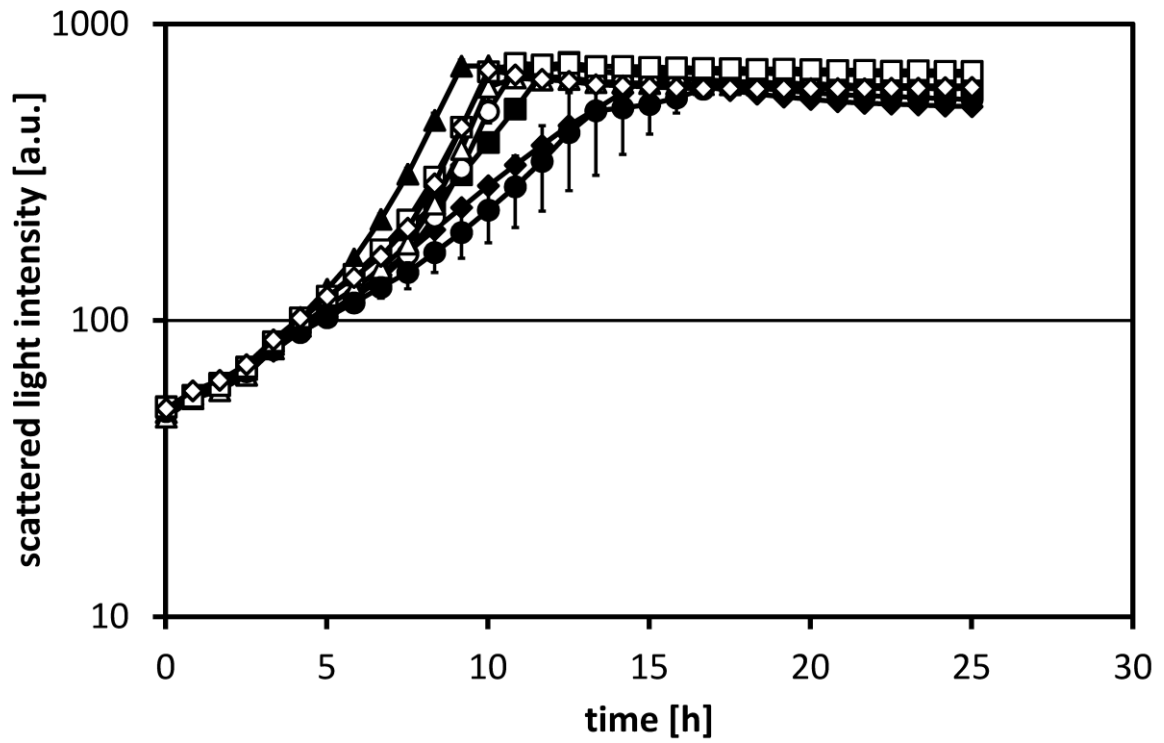

**Figure S4. Growth of *C. glutamicum*  $\Delta cat$  with methanol.** Growth of *C. glutamicum* wild type (diamonds), Tol1 (triangles), T2840 (circles) and the deletion mutant  $\Delta cat$  (squares) in minimal medium with 100 mM glucose (open symbols) and additional 240 mM methanol (closed symbols). Means and imprecision of two independent cultures are shown.

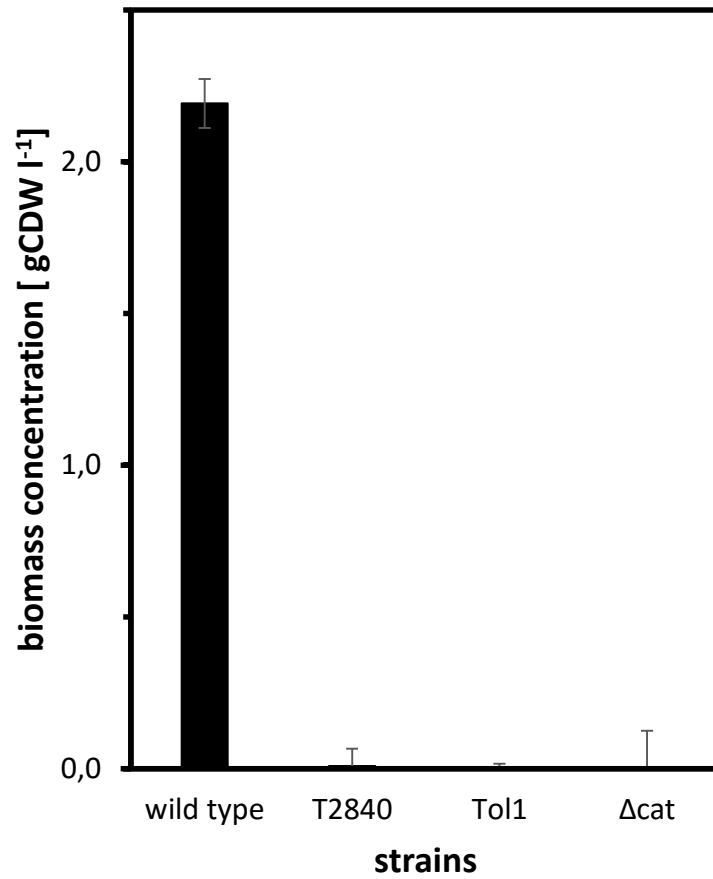

**Figure S5. Biomass formation of *C. glutamicum* wild type, Tol1, T2840 and  $\Delta cat$  in minimal medium with ethanol as sole carbon source.** CgXII minimal medium with 1% ethanol was used. Means and standard deviations of three independent cultures are shown.
